# Supplementary material for: Characterization and Mechanical Testing of Manufacturing Defects Common to Composite Wind Turbine Blades
Source: Copernicus journal article supplement (doi:10.5194/wes-2017-13), 2017-04-11
Supplement: Supplementary file [file wes-2017-13-AC1-supplement.pdf]

## Author Comments for Review #1

The authors are grateful for the comments, suggestions, and insight from the reviewer. Please find comments below [with text locations included where appropriate] and an updated version of the paper following.

**RC1** Figures 1 and 2 are central for the understanding of the approach taken with the measurements of OP and IP waves. These figures must be improved, e.g. by including a schematic drawing of a materials specimen in 3D showing the two types of waves. Also, the ruler representation must be identical. The edge of the material in Figure 2 should be seen, to be able to identify the difference between OP and IP.

**AR** Figures 1 & 2 have been replaced with a new schematic drawing, identifying the wave types and their orientation relative to the entire blade structure. The wave image in Figure 1 has been added to Figure 3 to help clarify the discretization process and helps readers understand their relationship to wind turbine blade structures.

**RC2** At page 6, the equation (3) is correct and relevant. It is however not clear how and where the equation is used to scale the fracture strengths of the composites. This must be made clear.

**AR** Significant detail added to the text describing the use of Equation used. [p. 6]

**RC3** Table 2. It is not clear how the fibre angles are scaled down to coupon test specimens. There are several errors in the table, e.g. 1.9 mm instead of 1.7 mm, and 7.4 mm instead of 67.4 mm. It is also confusing that OP4A and IP1 are the two baseline settings of mean values, and then placed in the bottom and top of the table, respectively.

**AR** Table 2 reformatted for clarity and numbering scheme updated throughout as suggested.

**RC4** It is not clear how the induced off-axis fibre angles in the specimens correspond to the wanted ones given in Table 2. This needs to be made clear.

**AR** Original blade data removed as it was redundant to Table 1 and Figure 7 above.

**RC5** In general, throughout the manuscript, there are error messages at places where references are made to figures and tables.

**AR** All links fixed.

**RC6** At page 4, line 3, it is not clear how the off-axis angle is determined. This must be explained.

**AR** Added "...which is found by measuring the maximum misalignment angle of deviation from the intended fiber direction" to clarify. [p. 4, lines 12-14]. This provides the reader with an unambiguous description of the procedure.

**RC7** Figures 5 and 6. In each figure, the axes of the two diagrams should be the same, to be able to directly compare the magnitude of the OP and IP waves. It could be considered to show the results of OP and IP waves in the same diagram.

**AR** Figure 6 has been removed and Figure 5 has been consolidated as suggested.

**RC8** Figure 6. Why are the results sorted from low to high by observations?

**AR** Figure 6 has been removed as it was deemed redundant.

**RC9** It can be argued that the use of 3 figures and 1 table for presenting the results of the measured OP and IP waves is too much. It is recommended omitting Figure 6.

- AR** Figure 6 has been removed as it was deemed redundant.
- RC10** Page 7, line 16, it is not clear how digital photographs were used to measure OP waves. Based on polished cross-sections?
- AR** OP specimens were not polished; porosity specimen were. Detail added to clarify. [p. 7, line 20-21 and p.8, line 1-2]
- RC11** Figure 8, “Radiographic images”?
- AR** Updated. Thanks!
- RC12** Figure 9, the porosity must be indicated, are they shown by black or white spots?
- AR** Added clarification to caption to identify the porosity as the white spots.
- RC13** Page 9, line 9-11. It is said that the strength degradation correlates well with the average off-axis fibre angle. It would be more correct to say that the correlation between the two parameters is well described by a sine function. Later it is said that the average fibre angle is showing a better correlation than the maximum angle; how to see that?
- AR** Sentences have been reworded to clarify: “These results show that strength degradation in laminates with waves tend to correlate well with the average of the maximum fiber misalignment angles of all layers in the laminate as measured through the thickness. An alternative correlation using the single maximum fiber angle can be achieved with a minor reduction in accuracy.” [p. 9, line 11-14]
- RC14** Figure 10. Use SI units. The fitting lines in (b) seem to be consisting of two lines (with transition points at about 10 and 13 degrees), and not made with a continuous mathematical function.
- AR** Thanks! Also, additional data points added to ensure consistency of trendline
- RC15** Figure 10. There are no compression data in (a)?
- AR** Given the inability to scale compression of the OP Wave in a representative manner, we are not comfortable presenting the results. We believe the data would not be relevant. This has been more directly explained in the text. [p. 9 line 14-19]
- RC16** At page 9, last line, change to “start with fibre dominated failure and transit to matrix dominated failure mode”?
- AR** Nice catch; thanks!
- RC17** Figure 11 shows a rather large variation in fibre angles between the 4 layers. This variation must somehow be included in the analysis as an uncertainty parameter.
- AR** Given the nature of the work and the focus of the BRC, it was determined that the worst-case was more important for characterization. In addition, due to the number of uncertainty parameters considered in the companion paper (Riddle et al.), this worst-case method was deemed sufficient. The authors will keep this comment in mind when considering future work.
- RC18** At page 10, line 16, it is said that failure stress is normalised by the part thickness. It is not clear how this is done, it needs to be explained.
- AR** Details were confused in the reduction of the work into this paper. Clarification has been made to this entire section. [Section 4.1.2: p. 10 line 22 through p. 11 line 9]

**RC19** Figure 12, It seems that both lines should start in 1. There are many samples with really high content of porosity, up to 14%. How is it ensured that the effect of porosity is not larger than the effect of the OP and IP waves?

**AR** Trends fixed to start at 1. The porosity section has been updated and refocused to more directly represent the results. Combined effects of defects were beyond the scope of this study and has been noted as future work.

**RC20** Page 11, line 5, it is said that model predictions of load displacement curves were accurate to within +/-5%; where is that shown?

**AR** This was a misplaced sentence from previous editing and did not belong in this section. It has been removed and may be found in the companion paper.

**RC21** Page 11, line 9, "Standard deviations shown for ultimate stress indicate the consistency of each test", what is meant by that?

**AR** Clarification text added: "...standard deviations included for ultimate stress to indicate the distribution size of the coupons tested for each defect type." [p. 11 line 11-13]

**RC22** Table 3. What is meant by the "Porosity" column?

**AR** Column header changed from "Porosity" to "2% Porosity" in both Tables 3 & 4.

**RC23** Table 5, what are "CMD" and "BMT"?

**AR** Table 5 updated with Data Source names changed for clarity.

**RC24** In the introduction, p. 1, line 27-28, the terms "advanced composite materials" and "lower cost composite materials" seem to be in contradiction to each other.

**AR** Clarified by changing to "continuous fiber" and "Lower cost fiberglass materials" respectively [p. 1, line 27-30]

**RC25** In affiliations, country is missing.

**AR** Affiliations added

# Characterization and Mechanical Testing of Manufacturing Defects Common to Composite Wind Turbine Blades

Jared W. Nelson<sup>1</sup>, Trey W. Riddle<sup>2</sup>, and Douglas S. Cairns<sup>3</sup>

<sup>1</sup>SUNY New Paltz, Division of Engineering Programs, New Paltz, NY, USA

<sup>2</sup>Sunstrand, LLC, Louisville, KY, USA

<sup>3</sup>Montana State University, Dept. of Mechanical and Industrial Engineering, Bozeman, MT, USA

**Abstract.** The Montana State University Composites Group performed a study to ascertain the effects of defects that often result from the manufacture of composite wind turbine blades. The first step in this multi-year study was to systematically quantify and database these defects before embedding similar defects into manufactured coupons. Through the Sandia National Laboratories Blade Reliability Collaborative (BRC), it was determined that key defects to investigate were fiber waves and porosity. An inspection of failed commercial-scale wind turbine blades yielded metrics that utilized specific parameters to physically characterize a defect. Methods to easily and consistently discretize, measure, and assess these defects based on the identified parameters were established to allow for statistical analysis. Data relating flaw parameters to frequencies of occurrence were analyzed and found to fit within standard distributions. Additionally, mechanical testing of coupons with flaws based on this physical characterization data was performed to understand effects of these defects. Representative blade materials and manufacturing methods were utilized and both material properties and damage progression were measured. It was observed that flaw parameters directly affected the mechanical response. While the data gathered in this first step is widely useful, it was also intended for use as a foundation for the rest of the study; to perform probabilistic analysis and comparative analysis of progressive damage models.

## 1 Introduction and Background

With the rapid growth of the wind segment of the energy market, it is important that wind farms achieve maximum availability by reducing down time due to maintenance and failures. Since most components of a wind turbine are located over 60 m (200ft) above the ground and are large and complex, performing repairs on site is costly and difficult. Repairs to these systems not only require the turbine to be shut down but the problematic system will often require a crane for removal. This is especially true for wind turbine blades where continuous fiber composite materials have become an optimal choice due to their high strength-to-weight ratio. Lower cost fiberglass materials and manufacturing methods have become the standard for wind turbine blades to compete with traditional energy production technologies. While the resulting final cost can be up to two orders of magnitude less than a typical aerospace composite structure, the inclusion of manufacturing defects is more likely. Typical defects are addressed in design using knockdown factors that are often conservative adding weight, cost, and time. Even with these knockdowns, it has been inferred that design and manufacturing within the wind industry does not always ensure a 20-year design life (Hill et al., 2009). A comprehensive study to characterize and understand the manufacturing flaws common in blades has not been performed within the public domain; however, research has been performed to

better understand what is needed to improve blade reliability (Hill et al., 2009; Red, 2008; Walford, 2008; Veldkamp, 2008). The Department of Energy sponsored, Sandia National Laboratory led, Blade Reliability Collaborative (BRC) was formed in large part to address this issue. The research described herein compiles the first stage of a multi-year program performed by Montana State University (MSU) within two areas—Flaw Characterization and Effects of Defects.

The primary goal of the MSU research initiative has been to develop a protocol which can be employed in a quality assurance and reliability program to quantify the implications of wind turbine blades containing manufacturing defects to ensure blade life while reducing costly repairs. In turn, these methods may then be used to improve blade manufacturing and design procedures. The function of the Flaw Characterization portion of this program has been to provide quantitative analysis for two major directives: acquisition and generation of quantitative flaw data describing common defects in composite wind turbine blades; and, development of a flaw severity designation system and probabilistic risk management protocol for as-built flawed structures (Riddle et al., 2017). The Effects of Defects portion focused on the development of state-of-the-art modelling capabilities, correlated to experimental data, to predict the mechanical response of included flaws (Nelson et al., 2017). As such, a foundational work to characterize typical defects and ascertain their effects on mechanical performance was performed and presented herein with both above references as companion papers.

## **2 Wind Industry Blade Survey and Flaw Characterization**

The Blade Reliability Collaborative (BRC) directed the MSU team to investigate the effects of porosity, in-plane (IP) and out-of-plane (OP) waves shown in Figure 1. As a point of distinction, wrinkles, where the wave has a fold-back reversal, were not included in the program. Based on statistical commonality in wind turbine blades, it was critical to the development of this program to identify the precise geometric nature of these flaws. To do this, a field study was performed using several commercial scale wind turbine blades that had been cut into sections were reviewed for both IP and OP waves where fibers deviate from ideal longitudinal straightness of the non-woven, uni-directional material. Images of these same sections were also taken for porosity analysis. This data set, while relatively small, provided a strong starting point for the entire project and specifically for the development of a protocol by which other blades may be examined and flaws may be characterized going forward. These techniques are not manufacturer or size dependent, and furthermore, could be applied to any composite structure in theory. While the methods used here are destructive, non-destructive inspection methods to find and quantify these defects continues under the Probability of Detection activity within the BRC (Roach et al., 2010).

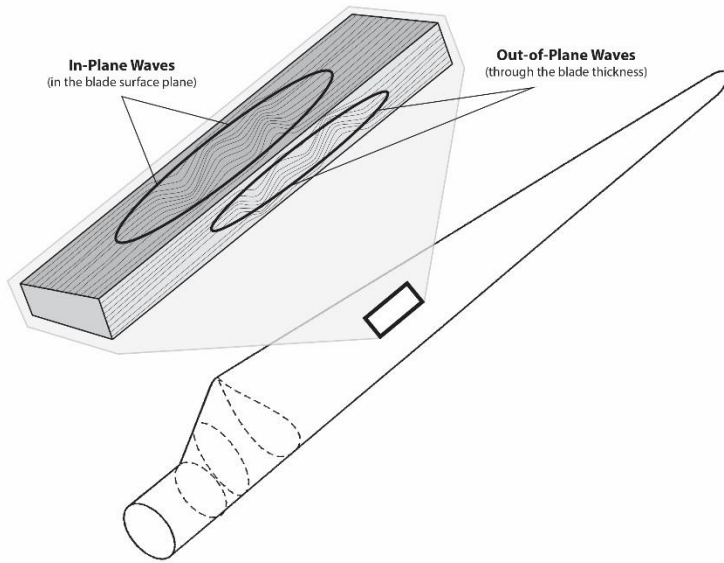

**Figure 1: Example of an out-of-plane (OP) wave where fiber waviness is observed through the thickness.**

The process by which in-plane and out-of-plane wave data were collected was essentially the same. An image processing software was used on photographs of as-built flawed blade sections where each defect feature was manually traced with a line as shown in black in Figure 2, top. A separate processing script was written to extract the spatial coordinate data of the traced defect line. From these data, each complete wave form was discretized into separate individual waveforms. One example of a complete wave and the waveform discretization process is shown in Figure 2. **Error! Reference source not found..**

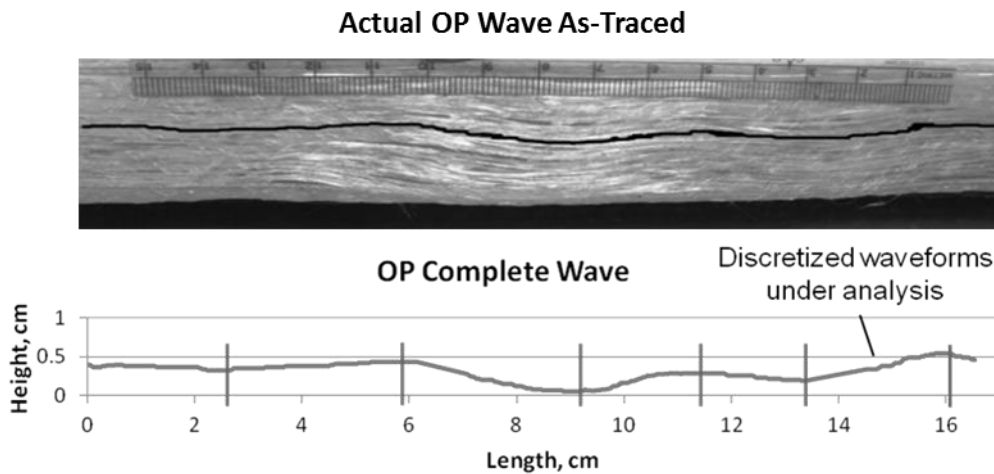

**Figure 2: Example of OP waviness, complete spatial data, and discretization positions.**

Each discretized wave form's geometry was then mathematically characterized; cubic spline (Equation 1) and sinusoidal curve (Equation 2) fits were both evaluated for their applicability to mathematically describe the wave perturbation:

$$Y = Ax^3 + Bx^2 + Cx + D \tag{1}$$

$$Y = E + F \sin\left(\frac{2\pi}{\omega x + \varphi}\right) \quad (2)$$

where  $A$ ,  $B$ ,  $C$ , and  $D$  are polynomial coefficients,  $E$  is the offset,  $F$  is the amplitude,  $\omega$  is the wavelength, and  $\varphi$  is the phase.

To optimize the goodness-of-fit of the wave spatial data to the mathematical formulations, a user built least squares regression algorithm was used. This function utilizes the Generalized Reduced Gradient (GRG) constrained optimization algorithm. In a least-squares data fitting method, the most accurate model is established by minimization of the sum of squared residuals. A residual being the difference between an observed value and the fitted value provided by a mathematical model. The GRG algorithm was used to manipulate model values ( $A$ ,  $B$ ,  $C$ ,  $D$ ,  $E$ ,  $F$ ,  $\omega$ ,  $\varphi$ ) until the sum of the squares was minimized (Biegler, 2011).

Both models, using spline and sinusoidal fits, yielded similar goodness-of-fit tendencies. The sinusoidal analysis proved to be faster and was utilized on bulk data analysis. Moreover, the ability to reference model parameters, which have a direct physical meaning (e.g. amplitude and wavelength), was useful in performing statistical characterization of wave parameters. Once a fit was performed, each wave segment was characterized in terms of wavelength, amplitude, and off-axis fiber angle which is found by measuring the maximum misalignment angle of deviation from the intended fiber direction (Figure 3). While previous studies have used aspect ratio or wave severity (amplitude/wavelength) instead of fiber angle as a metric for characterization, such quantification may be slightly more challenging in the field since aspect ratio requires knowing both the amplitude and wavelength (Adams and Hyer, 1993; Adams and Bell, 1995; Mandell et al., 2003). Even though it is possible that only the fiber angle can be measured directly in the field, wave amplitude ( $A$ ), wavelength ( $\lambda$ ), and off-axis fiber angle ( $\theta$ ) were characterized, as shown in Figure 3, for comparative purposes.

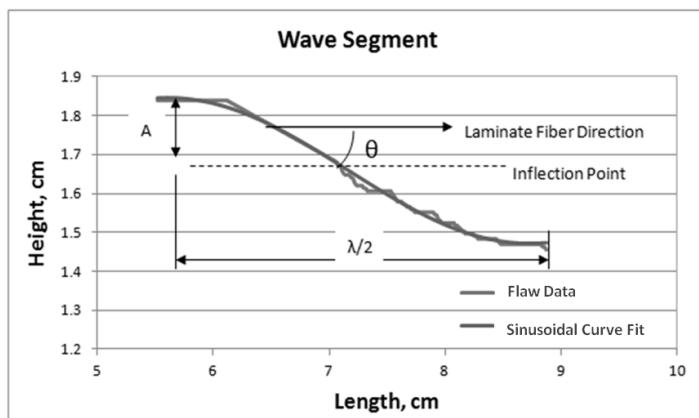

Figure 3: A sine wave superposed on a segment of the OP waviness shown in Figure 2.

## 2.1 Determination of Defect Parameters for Testing

Characterization of the various wave flaws found in the field study yielded 63 OP and 48 IP independent, discrete waveforms (Nelson et al., 2012). Values for amplitude and wavelength of each instance are shown in Figure 4 where it may be seen that there is significant variability within the data. However, the data are well grouped, indicating

consistency in the manufacturing processes. The resulting off-axis fiber angles from these OP and IP waves were collected and utilized as shown below in Figure 5. The reader should note that these angles were collected from blade sections which failed at these out-of-plane flaw locations, and therefore, these magnitudes likely include plastic deformation.

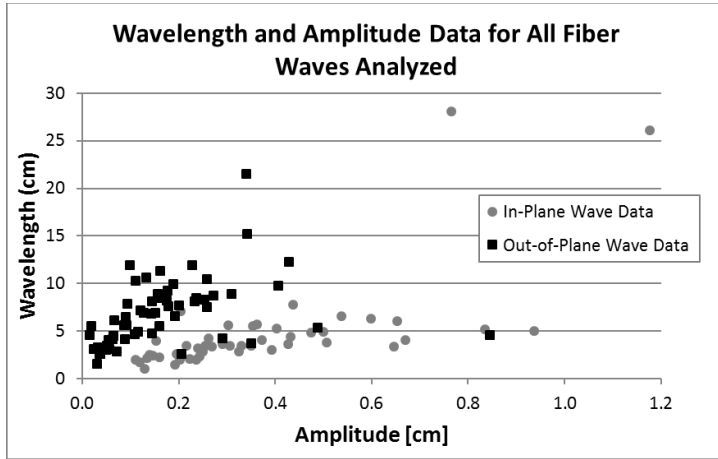

5 **Figure 4: Collected OP and IP wave data (left-to-right, respectively).**

Mean and standard deviation values were used to develop Normal distributions to describe the frequency of flaw magnitude occurrences and Weibull distributions (2 parameter) were generated using Maximum Likelihood Estimation. To develop frequency of occurrences distributions, the off-axis fiber angle values gathered from all wave segments were binned together into groups as shown in Figure 5. For OP waves, angles were binned in one-degree increments while for IP waves, angles were binned in four-degree increments. The frequency of each fiber angle can be seen in Figure 5 where the observed frequency of occurrence is displayed with applicable Weibull and Normal distribution curves. In general, maximum wave fiber angle values show a strong inclination towards common distributions such as the Weibull and Normal distributions for both cases with the Normal distribution utilized throughout the probabilistic analysis. In general, these distributions were presented for completeness for working with probabilistic effects of defects and it is up to the user to decide which is best case. Binning procedures were applied to amplitude and wavelength data for both wave types; however, the distributions were less accurate further justifying characterization with fiber angle. Generalized information regarding both IP and OP wave group data is summarized in Table 1.

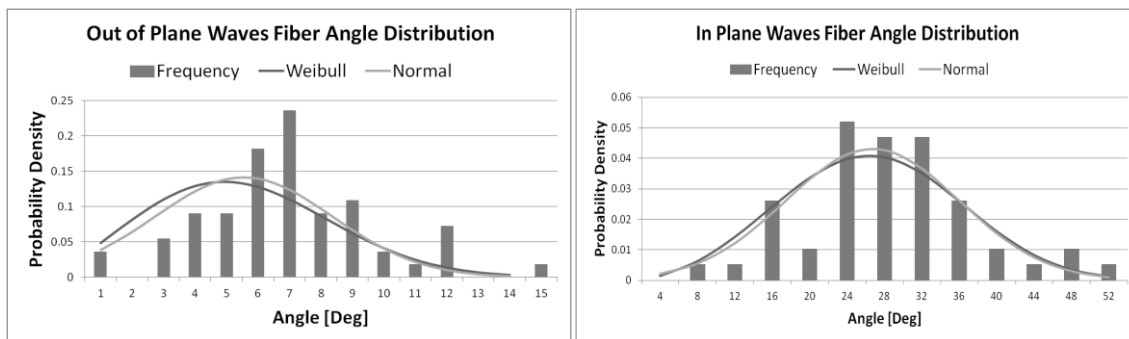

20 **Figure 5: Distribution of all OP (left) and IP (right) wave fiber angles gathered.**



**Table 1: Summary of wave data generated from processes outline above.**

| <i>OP Waves</i>    | Amplitude<br>(cm) | Wavelength<br>(cm) | Maximum Fiber<br>Angle (deg) |
|--------------------|-------------------|--------------------|------------------------------|
| Min                | 0.02              | 1.58               | 0.6                          |
| Max                | 0.85              | 21.49              | 39.0                         |
| Mean               | 0.17              | 6.74               | 8.6                          |
| Standard Deviation | 0.11              | 3.00               | 2.8                          |
| <i>IP Waves</i>    | Amplitude<br>(cm) | Wavelength<br>(cm) | Maximum Fiber<br>Angle (deg) |
| Min                | 0.11              | 1.08               | 8.7                          |
| Max                | 1.18              | 28.12              | 50.7                         |
| Mean               | 0.37              | 4.75               | 26.7                         |
| Standard Deviation | 0.23              | 4.96               | 9.3                          |

A test program focused on the characterization of the mechanical performance of specimen with scaled flaws was developed from the data collected in this study. Given the scale difference between the blades and coupon-sized test specimen, the flaws were scaled using a Weibull scaling analysis where fracture strength was adjusted with material volume. Based on this “weakest link” theory, as material volume decreases, the population of defects also decreases, thereby reducing the probability of a failure from a flaw. The ratio of fracture strengths may then be found if the probability of survival is assumed to be the same for both small and large-scale composite structures:

$$\frac{\sigma_1}{\sigma_2} = \left(\frac{V_2}{V_1}\right)^{\frac{1}{m}} \quad (3)$$

where  $\sigma_{1,2}$  are the fracture strengths,  $V_{1,2}$  are the volumes and  $m$  is the Weibull modulus. Comparisons were made between the coupons and as-built blade sections, utilizing the same length (coupon gauge length) and unit width. The 4-ply laminate test specimen have a thickness of ~3.2mm which is 8.8 times smaller (volumetrically) than actual as-built sections. Using the volume fraction and a modulus of 29.1 in Equation 3 (Wisnom, 1999), the Weibull scaling expression, it was found that the fracture strength for the larger as-built blade sections was expected to be approximately 7.1% less than the coupons. To scale the as-built OP flaw waveforms, the mathematical description of each wave was integrated over the half wavelength to calculate the cross-sectional area bounded by each flaw curve. This was the only parameter needed as unit width was considered. The volumetric ratio between the full-scale blade sections and test specimen was then applied to the as-built flaw cross sectional area. Knowing the scaled cross sectional area, the amplitude and wavelength of each wave was solved for. It is important to note that this analysis was appropriate for the out-of-plane waves only. The in-plane waves did not vary with thickness, and therefore, a volumetric scaling approach was not taken. Instead, each was scaled by the same ratio to fit within the coupon dimensions.

Using this method of scaling, three wave forms for each type of flaw were systematically chosen, as shown in Table 2. **Error! Reference source not found.**, for testing based on geometry characterization and statistical significance while representing data points around an angular region of interest. The parameters for waves OP1 and OP2 were identified to be included due to the similarity in fiber angle occurring from different a different combination of amplitude and wavelength. The additional OP wave (OP3) had mean values for all three parameters, and therefore, landed in the center of all the parameter distributions. As such, these data points combined to sufficiently described an OP wave common to the specific wind turbine application. The reader may note subtle variations in the mean

values when compared to Table 1 which result from the scaling process. By design, the mean value also delivered baseline values for comparison of the effects of amplitude and wavelength independently with the OP1 and OP2 results. In-plane test waves IP1 and IP2 followed this same approach as the OP where they each had different amplitudes and wavelengths, but resulted in similar misalignment angles. Similarly, the IP3 case represented the parametric mean for all values.

**Table 2: OP and IP wave parameters as scaled for use in the coupon testing program.**

| <b>Scaled OP Waves</b> | <b>Amplitude (cm)</b> | <b>Wavelength (cm)</b> | <b>Maximum Fiber Angle (deg)</b> |
|------------------------|-----------------------|------------------------|----------------------------------|
| <b>OP1</b>             | 0.29                  | 2.28                   | 36.8                             |
| <b>OP2</b>             | 0.07                  | 0.54                   | 34.8                             |
| <b>OP3</b>             | 0.07                  | 0.23                   | 8.6                              |
| <b>Scaled IP Waves</b> | <b>Amplitude (cm)</b> | <b>Wavelength (cm)</b> | <b>Maximum Fiber Angle (deg)</b> |
| <b>IP1</b>             | 0.45                  | 2.38                   | 48.9                             |
| <b>IP2</b>             | 0.19                  | 1.00                   | 47.8                             |
| <b>IP3</b>             | 0.19                  | 2.38                   | 24.8                             |

### 3 Coupon Manufacturing and Methodology

All test coupons consisted of four layer laminates infused utilizing a modified VARTM process with a PPG-Devold 1250 gram-per-square-meter primarily unidirectional E-glass and a Hexion RIM 135 resin system. The nominal fiber volume fraction of the panels was 55% with a nominal thickness of 0.8 mm for each layer resulting in a nominal total thickness of approximately 3.6 mm. Tensile coupons were cut to approximately 50 mm wide by 200 mm long and were tabbed resulting in a gage length of 100 mm. Compression coupons were cut to approximately 25 mm wide by 150 mm with gage lengths of 25 or 38 mm depending on flaw wavelength.

Manufacturing processes were developed and utilized to create coupons with wavy fibers (Riddle et al., 2013; Nelson et al., 2013). IP waves were introduced by manually pulling the fibers transversely for one entire wavelength. OP waves, also for one entire wavelength, were created by placing discontinuous fibers transversely to build up the waveform. Due to variability in the specimen manufacturing processes, it was necessary to characterize the as-built flaw parameters prior to testing to ensure that all correlations were performed accurately. Through thickness, IP wave images for each layer were collected with the use of a Computer Tomography (CT) scanner where wave parameters were measured as displayed in Figure 6. Out-of-plane waves were measured with the use of a high fidelity digital photographs in the same manner used to characterize the blade flaws above.

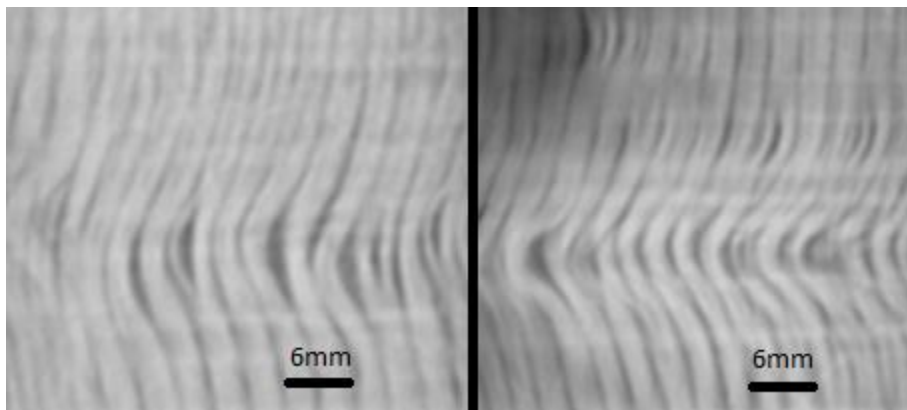

**Figure 6: Radiographic images of In-Plane waves found on different layers of one specimen.**

To measure the amount of porosity in the coupons, Scanning Electron Microscopy (SEM) was used to image the cut surface plan (Figure 7). Image processing techniques were then used to identify the location and size of gas inclusions and ultimately calculate the planar area fraction of porosity. This value was then extrapolated to percent porosity by volume. Burn off testing was used to validate the percent porosity. However, this technique yields no indication of size or location of inclusion, therefore, it was not employed for data collection. Given the difficulty in testing and the destructive nature of this method, alternative methods continue to be investigated including radiodensity which has shown promising results (Shapurian, et al., 2006).

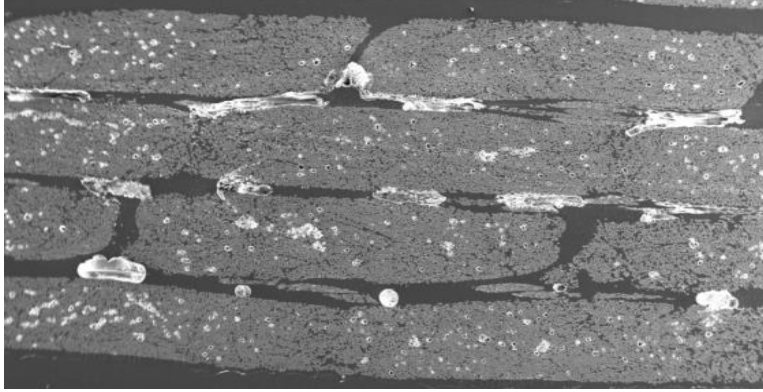

**Figure 7: Cross-section SEM image of a coupon containing porosity.**

Quasi-static, displacement controlled ramp tests on all specimens were conducted at a rate of 0.05 mm/s in tension and 0.45 mm/s in compression for all 4-ply coupons. These tensile tests were performed based on the ASTM D 3039 tensile testing of composites standard (ASTM D 3039, 2014). Compression testing was more loosely based on ASTM D 3410 and D 6641 (ASTM D 3410, 2014; ASTM D 6641, 2014). Digital Image Correlation (DIC) was utilized to capture displacement and full-field strain.

Material properties were calculated for each coupon and then averaged for each group. Where bending was found to be minimal enough to be disregarded, ultimate tensile or compressive strength was calculated:

$$F^{tu} = P^{max} / A \quad (4)$$

where  $F^{tu}$  is the ultimate tensile or compressive strength,  $P^{max}$  is the maximum load before failure, and  $A$  is the average cross sectional area. This equation was modified to calculate the stress at each point ( $\sigma_i$ ), necessary for plotting of stress-strain curves, by substituting  $P_i$ , the load at the  $i$ th point, for  $P^{max}$ . Similarly, ultimate shear strength was calculated for  $\pm 45^\circ$  specimen:

$$\tau_{12}^{tu} = P^{max} / 2A \quad (5)$$

where  $\tau_{12}^{tu}$  is maximum in-plane shear.

Strain was calculated utilizing a digital image correlation (DIC) system based on the full field of the coupon such that it was calculated for the entire gage section. To ensure a consistent method that would allow for calculation for both unflawed controls and flawed specimens, strain was generalized for the entire gage length which was the same

for all coupons. This allowed for consistent comparison given the different flaws, specifically the variation of fiber misalignment angles.

Once both stress and strain were calculated, modulus of elasticity ( $E$ ) was calculated for each specimen utilizing this data. Initial linear portions of each stress-strain curve (generally 0.1-0.3% strain) were chosen to ensure accuracy and consistency of the chord modulus utilized:

$$E = \Delta\sigma/\Delta\epsilon \tag{6.}$$

## 4 Results and Discussion

### 4.1 Effects of Defects Trends

The goal of establishing benchmark material and flaw testing based on in situ defect parameters to contribute to accurate prediction the Effects of Defects in thicker laminates such as those found in wind turbine blades was achieved. By assessing typical defects found in wind turbine blades, defects were discretised, measured, and scaled into coupon testing.

#### 4.1.1 IP and OP Wave Trends

The results of failure stress verses maximum fiber misalignment angle for IP and OP waves are shown in Figure 8. These results show that strength degradation in laminates with waves tend to correlate well with the average of the maximum fiber misalignment angles of all layers in the laminate as measured through the thickness. An alternative correlation using the single maximum fiber angle can be achieved with a minor reduction in accuracy. For example, an OP wave embedded in a planar structure under compression is predominately prone to buckling due to the inherent eccentricity. While buckling is a common mode of failure in a wind turbine blade, it is driven predominately by the global structure and local geometry effects. Thus, even with the use of symmetric OP waves to reduce buckling during coupon testing, the reduction in material property in a compressed section of a blade is likely to have a more complex effect. As such, no OP wave data is presented due for coupon test

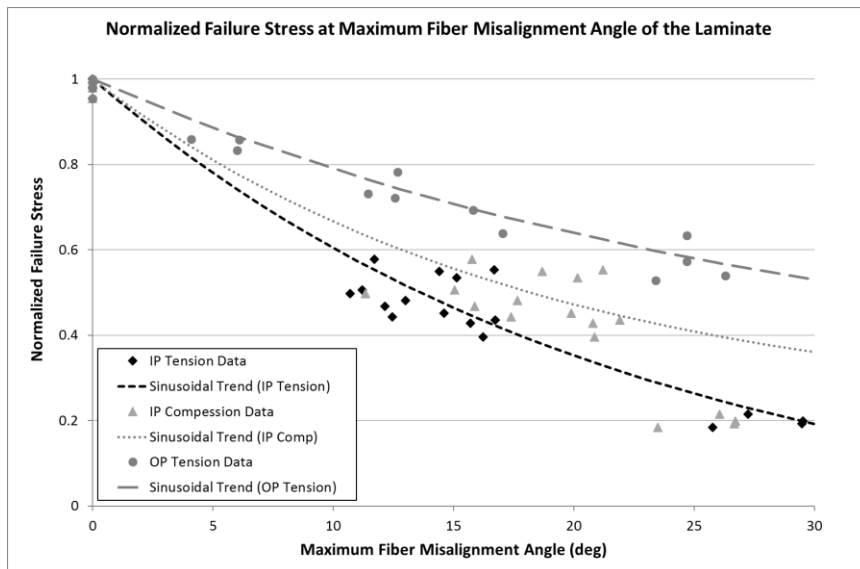

**Figure 8: Peak Stress of OP and IP Waves at various fiber angles (left-to-right, respectively).**

Linear regression analysis demonstrated that all the data displayed in Figure 8 fit best to exponentially decaying sinusoidal functions found by optimizing the coefficient of determination. This fit has roots from strength of materials failure criteria where for an off-axis ply, the stresses rotate per:

$$\sigma'_{ij} = a_{ik}a_{jl}\sigma_{kl} \quad (7)$$

5 where  $\sigma'_{ij}$  is the rotated local stress and  $\sigma_{kl}$  is the global stress, and  $a_{ik}$ ,  $a_{jl}$  are direction cosines of the rotated region. With an interactive failure criterion, such as Tsai-Wu, the failure curve verses off axis angle is essentially a decaying stress rotation function which starts with fiber dominated failure and quickly transitions to matrix dominated failure with off-axis loading (Barbero, 2011). Based on these results, this type of analysis can be used to quickly assess the tension and compression failure strengths of wavy materials.

10 Due to variability in the specimen manufacturing processes, it was necessary to characterize the as-built flaw parameters prior to testing to ensure that all correlations were performed accurately. Through thickness, in-plane wave images for each layer were collected with the use of a Computer Tomography (CT) scanner where wave parameters were measured as displayed in Figure 6. For the case of IP waves, each layer's off axis fiber angle was recorded and examples of the layer-by-layer variation in fiber angle is given in Figure 9. Once testing of the IP wave samples was completed, the results were reviewed for correlation to the maximum and average, through thickness wave angle. The analysis revealed very similar correlation traits, particularly when the maximum wave angle was considered making it the characteristic parameter used to describe as-built flaw magnitudes. Further, partners in the BRC suggested that using the maximum angle would fit more easily within a quality plan. Out-of-plane waves were measured with the use of a high fidelity digital photographs and little migration during manufacturing was noted.

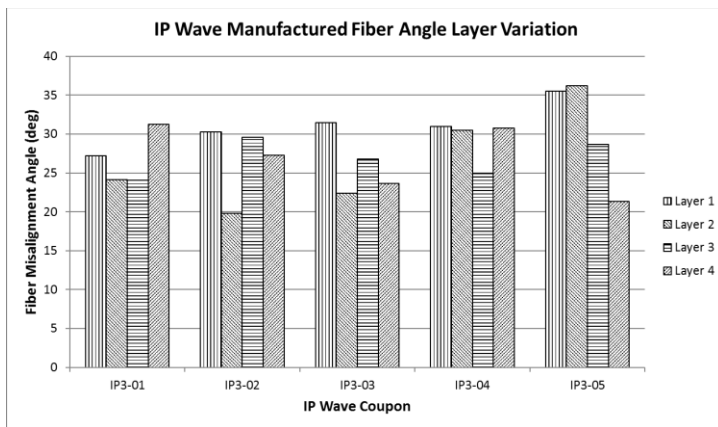

**Figure 9: Examples of layer-by-layer fiber wave variation.**

#### 4.1.2 Porosity Trends

25 Test specimens in the investigation have been manufactured using a vacuum bag technique, therefore it is necessary to include volume effects. A simple method for comparing results in this case is to normalize the failure stresses to 55% fiber volume ratio,  $V_f$ . Figure 10, left, shows a comparison between porosity content and the reduced strength. The void content was determined by image analysis of specimens from the same plates which were used for the test coupons. The void data are presented as a function of void content in the composite, to provide use to designers on

that basis. Some discussion on the micromechanics of voids in the composite is warranted. The influence of voids on the mechanical properties has the effect of reducing the bulk modulus of the resin. While this does not have as great of an effect in tension, the reduced modulus has a significant effect for compression strength as the reduced modulus does not support the fibers in compression as well as a stiffer matrix. While the results shown in Figure 10, left, are for an expected range, the entire dataset was compared with similar data from a prominent blade manufacturer with strong correlation between the two datasets (Figure 10, right) (TPI, 2010). Based on these results, the BRC decided to set 2% porosity as the upper threshold for acceptable porosity in blades. As such, further analysis was focused on this worst case, upper bound.

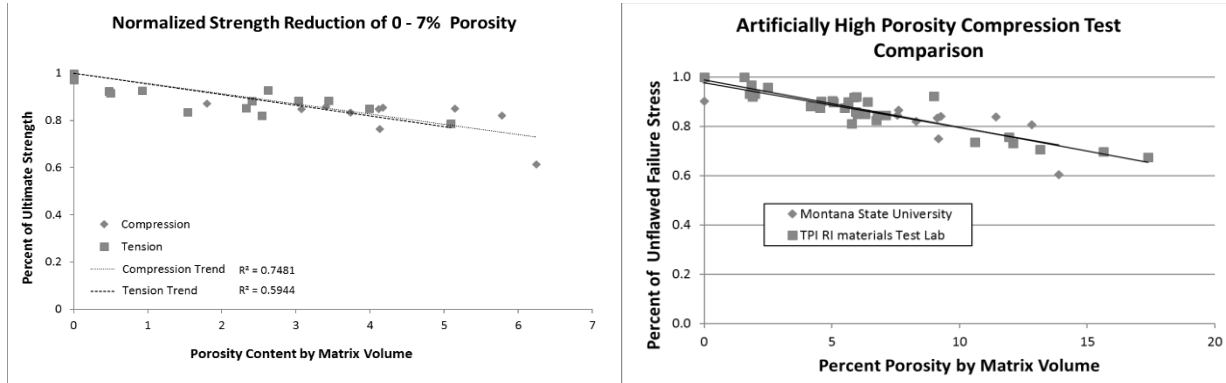

10 **Figure 10: Reduction in strength due to porosity in the 0 to 7% porosity range.**

#### 4.2 Comparison of Material Properties

Material properties for each coupon were calculated and averaged for each flaw group and are shown in Table 3 and Table 4 with standard deviations included for ultimate stress to indicate the distribution size of the coupons tested for each defect type. It is important to note that the 2% porosity case was used due to the BRC setting this as the threshold of acceptable porosity. To ensure accuracy of these values, comparisons were made between the control results and the results of similar tests published in the Montana State University Composite Material Database (Table 5). Modulus of elasticity and maximum strain were chosen as points of comparison as they were critical for analytical inputs and correlation. These comparisons indicated that while the material properties compare acceptably for tension, the compressive failure strains for the test group appeared less accurate. This was likely due to the unrestrained method of testing in compression which resulted in bending and buckling. However, much less bending was noted in the flawed specimen, apart from OP waves. The lack of bending prior to failure indicated that damage was occurring at the flawed area prior to bending occurring suggesting that these data were acceptable.

20 **Table 3: Static properties for laminates tested in tension and calculated percentage of control laminates.**

| Tension                     | Control |       | 2% Porosity |       | IP1   |       | IP2   |       | IP3   |       | OP1   |       | OP2   |       | OP3   |       |
|-----------------------------|---------|-------|-------------|-------|-------|-------|-------|-------|-------|-------|-------|-------|-------|-------|-------|-------|
|                             | 0°      | ±45°  | 0°          | ±45°  | 0°    | ±45°  | 0°    | ±45°  | 0°    | ±45°  | 0°    | ±45°  | 0°    | ±45°  | 0°    | ±45°  |
| Ultimate Stress (MPa)       | 990     | 112   | 950         | 103   | 344   | 109   | 226   | 107   | 521   | 108   | 417   | 84    | 742   | 101   | 752   | 102   |
| Standard Dev                | (40)    | (2.0) | (19)        | (1.5) | (43)  | (1.1) | (24)  | (4.7) | (24)  | (4.1) | (26)  | (5.3) | (79)  | (2.2) | (43)  | (2.8) |
| % Control                   | --      | --    | 96%         | 93%   | 35%   | 98%   | 23%   | 96%   | 53%   | 97%   | 42%   | 75%   | 75%   | 91%   | 76%   | 91%   |
| Strain at Failure (%)       | 2.64%   | 2.61% | 2.54%       | 3.32% | 1.66% | 3.07% | 1.66% | 2.41% | 1.66% | 3.23% | 4.77% | 4.91% | 4.92% | 4.06% | 4.56% | 4.43% |
| % Control                   | --      | --    | 96%         | 127%  | 63%   | 118%  | 63%   | 92%   | 63%   | 124%  | 181%  | 188%  | 186%  | 156%  | 173%  | 170%  |
| Modulus of Elasticity (GPa) | 41.1    | 16.2  | 39.6        | 16.6  | 34.8  | 16.8  | 24.1  | 16.6  | 39.6  | 18.7  | 17.3  | 5.9   | 30.8  | 16.1  | 31.2  | 15.3  |
| % Control                   | --      | --    | 96%         | 103%  | 85%   | 104%  | 59%   | 100%  | 96%   | 115%  | 42%   | 36%   | 75%   | 100%  | 76%   | 94%   |
| Poisson's ratio             | 0.27    |       | --          | --    | --    | --    | --    | --    | --    | --    | --    | --    | --    | --    | --    | --    |

**Table 4: Static properties for laminates tested in compression and calculated percentage of control laminates.**

| Compression                      | Control |       | 2% Porosity |       | IP1   |       | IP2   |       | IP3   |       | OP1   |       | OP2   |       | OP3   |        |
|----------------------------------|---------|-------|-------------|-------|-------|-------|-------|-------|-------|-------|-------|-------|-------|-------|-------|--------|
|                                  | 0°      | ±45°  | 0°          | ±45°  | 0°    | ±45°  | 0°    | ±45°  | 0°    | ±45°  | 0°    | ±45°  | 0°    | ±45°  | 0°    | ±45°   |
| Ultimate Stress (MPa)            | 582     | 124   | 491         | 125   | 216   | 181   | 216   | 139   | 257   | 165   | 95    | 43    | 227   | 90    | 207   | 86     |
| Standard Dev                     | (28)    | (1.2) | (20)        | (1.5) | (10)  | (5.0) | (9.0) | (3.0) | (23)  | (2.8) | (13)  | (2.1) | (3.4) | (7.5) | (5.7) | (0.78) |
| % Control                        | --      | --    | 84%         | 101%  | 37%   | 147%  | 37%   | 112%  | 44%   | 133%  | 16%   | 35%   | 39%   | 72%   | 36%   | 70%    |
| Strain at Failure (%)            | 1.76%   | 1.16% | 1.44%       | 1.06% | 0.84% | 0.51% | 0.92% | 0.82% | 0.84% | 0.59% | 0.70% | 1.11% | 1.04% | 0.94% | 0.92% | 0.84%  |
| % Control                        | --      | --    | 82%         | 91%   | 48%   | 44%   | 52%   | 71%   | 48%   | 51%   | 40%   | 96%   | 59%   | 81%   | 52%   | 72%    |
| Est. Modulus of Elasticity (GPa) | 37.2    | 15.5  | 36.5        | 16.4  | 30.9  | 28.7  | 29.4  | 19.7  | 34.2  | 25.4  | 8.2   | 4.5   | 23.1  | 12.4  | 23.4  | 11.9   |
| % Control                        | --      | --    | 98%         | 106%  | 83%   | 185%  | 79%   | 127%  | 92%   | 164%  | 22%   | 29%   | 62%   | 80%   | 63%   | 77%    |
| Poisson's ratio                  | 0.28    |       | --          |       | --    |       | --    |       | --    |       | --    |       | --    |       | --    |        |

5 **Table 5: Comparison of control test results to published MSU composites database results in tension and compression. (\* indicates exact material match not available and a similar material system used.)**

| Test                        | Tension  |         |          |         | Compression |         |          |         |
|-----------------------------|----------|---------|----------|---------|-------------|---------|----------|---------|
|                             | 0°       |         | ±45°     |         | 0°          |         | ±45°     |         |
| Material Orientation        |          |         |          |         |             |         |          |         |
| Data Source                 | Database | Testing | Database | Testing | Database    | Testing | Database | Testing |
| Modulus of Elasticity (GPa) | 41.1     | 40.6    | 14.9     | 16.2    | 38.4*       | 37.2    | 14.4*    | 15.5    |
| Strain at Failure (%)       | 2.7      | 2.6     | 2.9*     | 2.6     | 2.4         | 1.8     | 1.6      | 1.6     |

#### 4.2.1 IP Wave Analysis

10 Ultimate stress values for the each of the 0° IP wave groups tested in tension were found to have a significant decrease in ultimate stress: from 54% down to 25% of the control for the IP waves. As noted in Table 2, the amplitude and wavelengths for each of these waves varied, and even though IP3 had the highest ultimate stress, it also had the largest wavelength. Furthermore, IP1 had a larger amplitude and wavelength than IP2, while the ultimate stress for each was approximately the same. Based on previous research, similarity of the results was expected between the IP1 and IP2 groups, as the fiber angles were similar in the two groups.

15 It is also interesting to note that the stiffness for these groups was 85-96% of the control. Initial stiffness was similar to the control; however, the ultimate stresses and strains were notably lower. This was likely due to the load matrix “locking” the fibers into place at the ends of each wave before the matrix cracking noted above. Very similar results and trends were also noted for the 0° IP wave groups tested in compression. Overall, IP waves resulted in reduced material properties when included in 0° laminates.

20 The ±45° groups tested in tension were noted to have a similar damage progression as the 0° wave groups as noted in ultimate stress values very similar to the control group (96-98% of control) and the strains at failure were found to be relatively consistent with the control (92-112%). Of note was the stiffness increase compared to the control group (103-115%), likely for the same reasons given for the 0° IP groups noted above, which resulted in significantly lower values for Poisson’s ratio. The ±45° compression results were rather remarkable, as the ultimate stress for all IP wave groups was significantly higher compared to similar control groups (127-185%) even though  
 25 strains at failure were lower (48-52%). This resulted in significantly stiffer ±45° laminates causing a negative Poisson’s ratio for the IP wave groups in compression. These results are due to the increase load-carrying ability of the laminates caused by the fibers in the wave approaching 0°. However, both IP1 and IP2 had the same fiber angle though the ultimate stresses in each were different: 181 and 139 MPa, respectively. This difference may be from  
 30 differences between initial imparted and as-manufactured amplitudes, wavelengths, fiber angles, and the fiber content of the final laminate as noted above. In short, while properties decreased in 0° laminates including IP

waves, laminates including  $\pm 45^\circ$  performed as well or better than control, eliminating the need for further analysis. In addition, these data offer reasonable convergence points for the analytical models efforts.

Damage progression was found to vary for each wave type, but was observed to generally involve matrix cracking, fiber failure, and ply delamination often before load redistribution up to ultimately failure. Damage progression of the IP Waves, as shown for a representative case in Figure 11, was directly influenced by the flaw. It is apparent in the images associated with each identified full field average strain that damage occurs around the wave. With the aid of the DIC, it was noted that the strain accumulated in the wave area progressing transversely from the angled fiber toward the peak of the wave as seen in the 1.1% strain compared to the 1.5% strain DIC images. Fiber breakage appeared to initiate at the point where the strain accumulations from each side of the wave met as seen in the 2% strain DIC image. These observations combined with the strains at failure indicate that damage accumulation was at lower strains than the control group and was the result of shear softening leading to shear failure around the wave. Similar responses were noted for compression and the other IP wave cases.

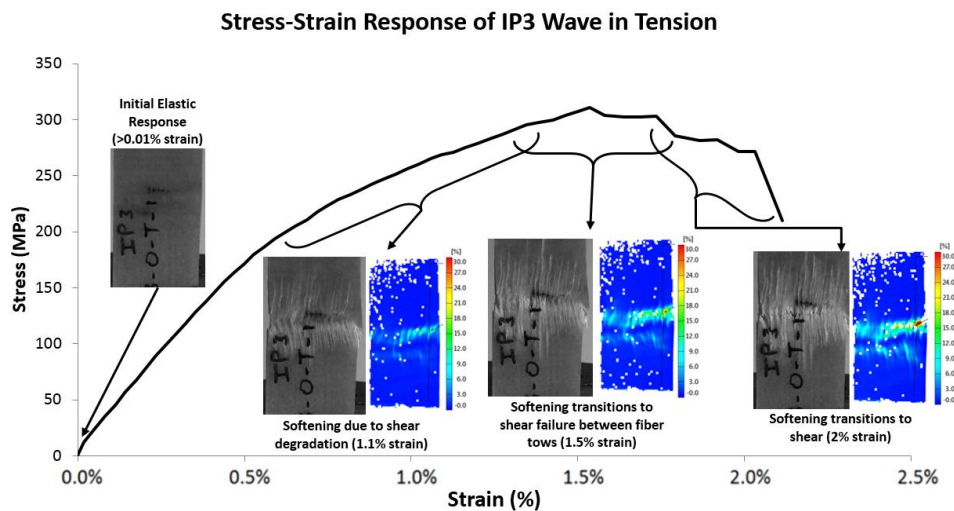

Figure 11: Stress-strain response of IP3 wave coupon shown at increasing average full field strain with associated DIC strain fields identifying damage progression.

In summary, it should be noted that the IP3 case had decreases in material strength, and significant degradation was noted, making the result that this case was optimal for baseline use for modelling efforts (Riddle et al, 2017; Nelson et al, 2017). Further, it was decided that since this case had a fiber misalignment angle close to  $30^\circ$ , it would be a good median case for these endeavors. The resulting stress-strain curves, utilizing the DIC data from this test group, for this IP wave case in tension and compression are found in Figure 12. Data beyond failure and maximum stress was gathered to begin to establish a comprehensive understanding of the material to be applied to future work with larger substructures and structures. As such, this geometry and these results were utilized as the baseline model for experimental/analytical correlation of each modelling type outlined below.



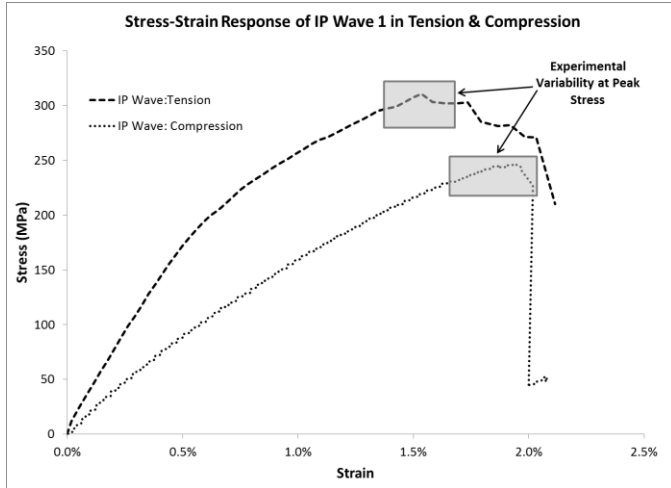

**Figure 12: Stress-strain of IP Wave 3 in tension and compression utilized for baseline model correlations with associated experimental variability.**

#### 4.2.2 OP Waves Analysis

5 Test results for the OP wave groups are also noted in Table 2 and Table 3 with a representative stress-strain response shown in Figure 13. Results from test observation and the DIC suggest that each of the OP wave groups was noted to have similar damage progression in tension compared to IP waves where delamination took the place of the matrix damage between the fiber tows. As strain levels increased, cracks initiated in the resin between the layers at the ends of the wave before delaminating. However, unlike the behavior of IP waves, after delamination and significant fiber straightening, the failure area for the OP wave specimens was concentrated at the peak area of the wave. This was due to the fibers being pulled straight and the center of bending being at the peak of the wave. Due to the eccentricity, compression testing of the OP waves was difficult due to large wavelengths creating a long, unsupported gage length resulting in bending and ultimately buckling. As such, significant decreases in calculated moduli of elasticity, ultimate strength, and strain at failure were noted and results were considered unusable for correlation given these responses.

10

15

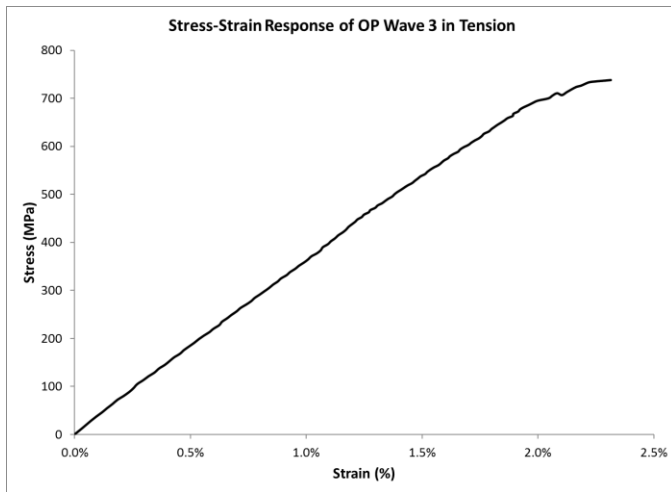

**Figure 13: Stress-strain of OP Wave 3 in tension utilized for initial OP wave model correlations.**

It must be noted that the wave forms for all the OP1 group delaminated during testing. This resulted in an extreme decrease in the ultimate stress and stiffness results of the OP1 groups in both tension and compression. As such, OP1 was deemed unusable for correlation in both tension and compression. The two other cases, OP2 and OP3, were found to have a more consistent response. Ultimate stress and strain at failure values for the OP2 and OP3 0° and ±45° tension groups were decreased compared to the control but were increased compared to the IP waves. Thus, moduli of elasticity values were similar to the control due to load being transferred more consistently through the wave than seen with IP waves due to the configuration described above. Given the consistency of these waves in tension, the OP3 case was utilized for correlation. Overall, the static testing performed allowed for initial analysis while determining convergence points for analytical models.

## 5 Conclusions and Future Work

Using this consistent framework that was established and validated, defects common to wind turbine blades have been quantified. To effectively characterize, categorize, and analyze defects, the framework requires accurate data collection following consistent scientific procedures. This provides an unambiguous, benchmark set of data to compare to more random, as-manufactured defects. With proper characterization, it is possible to establish the mechanical response of a flaw using laboratory testing. Results from static testing indicate that there is a strong correlation between flaw parameters and mechanical response. Since the flaws went across the entire width of the sample, applying these knockdowns directly is conservative, but may not be realistic, especially if surrounding material in a blade structure can redistribute loads from local failures. Going forward, the characterization techniques described herein may be applied to incoming data will enable the generation of a statistically significant and comprehensive flaw database.

This work provides a sound starting point, but only constitutes the building blocks for a comprehensive reliability program aimed at reducing failures as a result of defects. Since reliability estimation is inadequate for composite structures due to the uncertainties, a probabilistic approach is required to achieve an acceptable level of confidence. This approach must consider multi-scale mechanical property variability, damage/defect detection, damage progression, residual strength analysis, global, and macro structural response

Using the metrics developed herein to precisely address the geometric nature of flaws based on statistical commonality in blades, mechanical testing and probabilistic modelling were performed. The work herein led to establishment a consistent framework that was validated for quantitative categorization and analysis of flaws to predict blade failure. Further, this significant coupon level testing effort has determined material properties and characterized damage progression in both flawed and unflawed specimen allowing for baseline comparisons of the modelling methods. In short, these data allowed for direct comparison in determination of the consistency, accuracy, and predictive capability of each modelling approach.

## References

- Adams, D. O., and Hyer, M. Effects of layer waviness on the compression strength of thermoplastic composite laminates, *J. of reinforced plastics and composites*, 12, 414, <https://doi.org/10.1177/073168449301200404>, 1993.
- 5 Adams, D. O., and Bell, S. J. Compression strength reductions in composite laminates due to multiple-layer waviness, *Composites science and technology*, 53, 207—212, [https://doi.org/10.1016/0266-3538\(95\)00020-8](https://doi.org/10.1016/0266-3538(95)00020-8), 1995.
- ASTM D3039 / D3039M-14, Standard Test Method for Tensile Properties of Polymer Matrix Composite Materials, ASTM International, [https://doi.org/10.1520/D3039\\_D3039M-14](https://doi.org/10.1520/D3039_D3039M-14), 2014.
- 10 ASTM D3410 / D3410M-16, Standard Test Method for Compressive Properties of Polymer Matrix Composite Materials with Unsupported Gage Section by Shear Loading, ASTM International, [https://doi.org/10.1520/D3410\\_D3410M-16](https://doi.org/10.1520/D3410_D3410M-16), 2016.
- ASTM D6641 / D6641M-16e1, Standard Test Method for Compressive Properties of Polymer Matrix Composite Materials Using a Combined Loading Compression (CLC) Test Fixture, ASTM International, [https://doi.org/10.1520/D6641\\_D6641M-16E01](https://doi.org/10.1520/D6641_D6641M-16E01), 2016.
- 15 Barbero, E. J., *Introduction to Composite Materials Design* (1<sup>st</sup> Edition), CRC Press, 2011.
- Biegler, L. T., *Nonlinear Programming: Concepts and Algorithms for Process Optimization*, Pittsburgh: Carnegie Mellon, CAPD Center, 2011.
- Hill, R. R., Peters, V. A., Stinebaugh, V. A., and Veers, P. S., *Wind Turbine Reliability Database Update*, Sandia Report SAND2009-1171, 2009.
- 20 Mandell, J., Samborsky, D., Wang, L., and Wahl, N., *New fatigue data for wind turbine blade materials*, AIAA SDM Conference, 2003.
- Nelson, J.W., Riddle, T.W., and Cairns D.S., *Characterization of Manufacturing Defects Common to Composite Wind Turbine Blades: Effects of Defects*, AIAA SDM Conference Denver, 2011.
- 25 Nelson, J.W., Riddle, T.W., and Cairns D.S., *Effects of defects in composite wind turbine blades: round 2*, Sandia Report SAND2012-8110, 2012.
- Nelson, J. W., *A comparison of continuum and discrete modelling techniques of the effects of manufacturing defects common to composite structures*, PhD Thesis, Montana State University, 2013.
- Nelson, J. W., Riddle, T. W., and Cairns, D. S.: *Progressive Damage Modeling of Fiberglass/Epoxy Composites with Manufacturing Induced Waves Common to Wind Turbine Blades*, *Wind Energ. Sci. Discuss.*, <https://doi.org/10.5194/wes-2017-15>, in review, 2017.
- 30 Red, C., *Wind turbine blades: Big and getting bigger*, *Composites Technology*, June, 2008.
- Riddle, T.W., Cairns D.S. and Nelson, J.W. *Characterization of Manufacturing Defects Common to Composite Wind Turbine Blades: Flaw Characterization*, AIAA SDM Conference Denver, 2011.
- 35 Riddle, W.W, *Development of reliability program for risk assessment of composite structures treating defects as uncertainty variables*, PhD Thesis, Montana State University, 2013.

- Riddle, T. W., Nelson, J. W., and Cairns, D. S.: Probabilistic Design of Wind Turbine Blades with Treatment of Manufacturing Defects as Uncertainty Variables in a Framework, *Wind Energ. Sci. Discuss.*, <https://doi.org/10.5194/wes-2017-14>, in review, 2017.
- 5 Roach, D., Rackow, K., and Duvall, R., Addressing the need for non-destructive inspection of wind turbine blades, *Wind Turbine Blade Workshop*, Sandia National Labs, 2010.
- Shapurian, T., Damoulis, P. D., Reiser, G. M., Griffin, T. J., and Rand, W. M., Quantitative evaluation of bone density using the Hounsfield index, *The international journal of oral and maxillofacial implants*, 21:2, 290-298, 2006.
- 10 TPI-RI Materials Testing Lab, Compressive Testing of Specimens with Artificially High Void Content, Doc. No. 10022, 2010.
- Veldkamp, D., A Probabilistic Evaluation of Wind Turbine Fatigue Design Rules, *Wind Energy*, 11, 655–672, <https://doi.org/10.1002/we.287>, 2008.
- Walford, C.A., *Wind Turbine Reliability: Understanding and Minimizing Wind Turbine Operation and Maintenance Costs*, Sandia Report SAND2006-1100, 2008.
- 15 Wisnom, M.R., Size effects in the testing of fibre-composite materials, *Composite science and technology*, 59, [https://doi.org/10.1016/s0266-3538\(99\)00053-6](https://doi.org/10.1016/s0266-3538(99)00053-6), 1999.
